# Supplementary material for: Macular Thickness in Intermediate Age-Related Macular Degeneration Is Influenced by Disease Severity and Subretinal Drusenoid Deposit Presence
Source: PubMed Central journal article supplement — Invest Ophthalmol Vis Sci. 2020 Jun 30;61(6):59. doi: 10.1167/iovs.61.6.59 (PMC7415904; doi:10.1167/iovs.61.6.59), 2020-06-30
Supplement: iovs-61-6-59_s001.pdf [file iovs-61-6-59_s001.pdf]

## Supplementary Figure 1

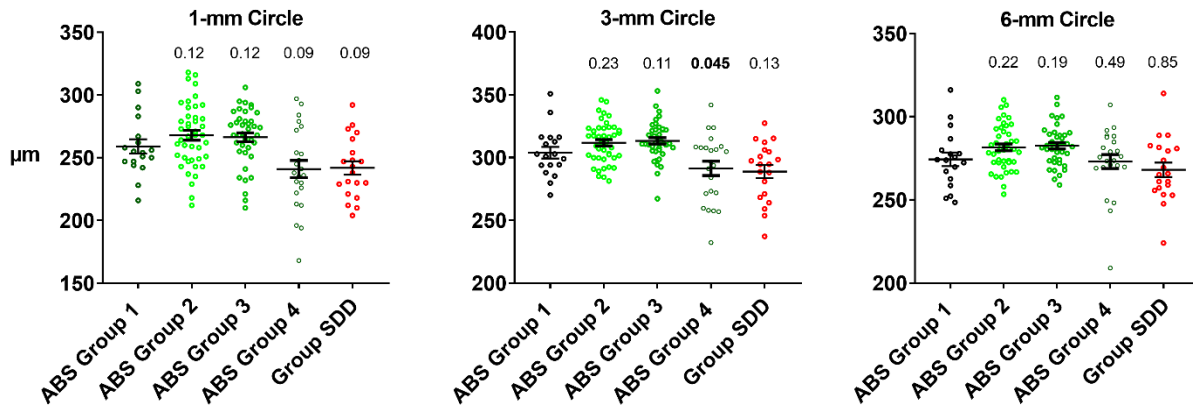

**Figure S1. Comparison of total retinal thickness of eyes with intermediate AMD in separate severity categories on the AREDS severity scale to obtain a AREDS-based scale (ABS).** Total retinal thickness (TRT) measurements were obtained in study eyes at baseline over the central 1-mm, 3-mm, and 6-mm circles. TRT distributions for each intermediate AMD severity group (ABS Group 2, 3, 4, SDD) on the modified AMD simplified severity scale were compared with the control group (ABS Group 1). Comparisons were made between eyes in ABS Group 1 and eyes in each of the other severity groups. The horizontal lines and error bars represent the mean and standard error of the distribution respectively. The P values shown above each group were obtained from multivariate analyses; significant values are highlighted in bold.
