# Supplementary material for: Macular Thickness in Intermediate Age-Related Macular Degeneration Is Influenced by Disease Severity and Subretinal Drusenoid Deposit Presence
Source: PubMed Central journal article supplement — Invest Ophthalmol Vis Sci. 2020 Jun 30;61(6):59. doi: 10.1167/iovs.61.6.59 (PMC7415904; doi:10.1167/iovs.61.6.59), 2020-06-30
Supplement: iovs-61-6-59_s002.pdf [file iovs-61-6-59_s002.pdf]

**Table S1. Patient demographics and ocular characteristics of the subset of study eyes with four years of longitudinal follow-up (N=77) grouped by AMD severity using the modified AMD simplified severity scale**

|                                            |                                 | Group 0                                  | Group 1                           |                               | Group 2                                        |                                 | Group SDD       |                         | All Eyes     |
|--------------------------------------------|---------------------------------|------------------------------------------|-----------------------------------|-------------------------------|------------------------------------------------|---------------------------------|-----------------|-------------------------|--------------|
| Study Eye Description (at baseline visit)  |                                 | No large drusen <sup>†</sup> or late AMD | Presence of large drusen (>125um) |                               | Presence of large drusen Large drusen (>125um) |                                 | Presence of SDD |                         |              |
| Fellow Eye Description (at baseline visit) |                                 | No large drusen or late AMD              | No large drusen or late AMD       |                               | Presence of large drusen or late AMD           |                                 |                 |                         |              |
| N                                          |                                 | 31                                       | 11                                |                               | 28                                             |                                 | 9               |                         | 79           |
| Patient Demographics                       | Mean Age at Baseline            | 73.22 (8.66)                             | 68.63 (10.39)                     | p=0.39 <sup>&amp;</sup>       | 70.97 (8.95)                                   | p=0.69 <sup>&amp;</sup>         | 77.18 (8.06)    | p=0.58 <sup>&amp;</sup> | 72.24 (9.09) |
|                                            | Sex (% Male)                    | 41.94                                    | 45.45                             | p=0.99 <sup>&amp;</sup>       | 46.42                                          | p=0.98 <sup>&amp;</sup>         | 22.22           | p=0.66 <sup>&amp;</sup> | 41.77        |
|                                            | Ever Smoked (%)                 | 48.38                                    | 45.45                             | p>0.99 <sup>&amp;</sup>       | 57.14                                          | p=0.87 <sup>&amp;</sup>         | 36.36           | p>0.99 <sup>&amp;</sup> | 50.63        |
|                                            | OD (%)                          | 61.29                                    | <b>18.18</b>                      | <b>p=0.04<sup>&amp;</sup></b> | 42.86                                          | p=0.23 <sup>&amp;</sup>         | 44.44           | p=0.74 <sup>&amp;</sup> | 46.83        |
| Ocular Characteristics                     | Axial Length* (mm)              | 24.56                                    | 24.17                             | p=0.84 <sup>&amp;</sup>       | <b>24.15</b>                                   | p=0.66 <sup>&amp;</sup>         | 22.72           | p=0.18 <sup>&amp;</sup> | 24.21        |
|                                            | Pseudophakia at Baseline (%)    | 35.48                                    | 18.18                             | p=0.57 <sup>&amp;</sup>       | <b>7.14</b>                                    | <b>p=0.04<sup>&amp;</sup></b>   | 44.44           | p=0.93 <sup>&amp;</sup> | 24.05        |
|                                            | Mean BCVA at Baseline (letters) | 85.58 (4.45)                             | 86.64 (2.98)                      | p=0.93 <sup>&amp;</sup>       | <b>80.57 (7.48)</b>                            | <b>p=0.0096<sup>&amp;</sup></b> | 82.33 (5.48)    | p=0.35 <sup>&amp;</sup> | 83.58 (6.12) |
|                                            | Mean BCVA at 4 years            | 82.55 (5.77)                             | 85.09 (4.72)                      | p=0.64 <sup>&amp;</sup>       | 77.07 (13.31)                                  | p=0.35 <sup>&amp;</sup>         | 80.33 (5.57)    | p=0.78 <sup>&amp;</sup> | 80.71 (9.43) |

Values represent means with standard deviations in parentheses.

<sup>†</sup> Large drusen defined as drusen > 125µm in diameter as scored from color fundus photographs

*SDD* Subretinal drusenoid deposit

\* Axial length was obtained in 54 out of 77 study eyes (divided 19, 7, 19, 9 for Groups 0, 1, 2, SDD respectively).

<sup>&</sup> One-way ANOVA compared to Group 0, adjusted for multiple comparison using Sidak Corrections.

*BCVA* Best-corrected visual acuity

*RIT* Rod-Intercept time
