# Supplementary material for: Macular Thickness in Intermediate Age-Related Macular Degeneration Is Influenced by Disease Severity and Subretinal Drusenoid Deposit Presence
Source: PubMed Central journal article supplement — Invest Ophthalmol Vis Sci. 2020 Jun 30;61(6):59. doi: 10.1167/iovs.61.6.59 (PMC7415904; doi:10.1167/iovs.61.6.59), 2020-06-30
Supplement: iovs-61-6-59_s003.pdf [file iovs-61-6-59_s003.pdf]

**Table S2. Patient demographics and ocular characteristics of study eyes (N=143) at study baseline grouped by AMD severity on the AREDS severity scale**

|                        |                    | Group 1       | Group 2             |                         | Group 3             |                         | Group 4             |                                 | Group SDD       |                         | All Eyes     |
|------------------------|--------------------|---------------|---------------------|-------------------------|---------------------|-------------------------|---------------------|---------------------------------|-----------------|-------------------------|--------------|
| Study Eye Description  |                    | AREDS Stage 1 | AREDS Stage 2 and 3 |                         | AREDS Stage 4 and 5 |                         | AREDS Stage 6- 9    |                                 | Presence of SDD |                         |              |
| N                      |                    | 18            | 43                  |                         | 39                  |                         | 23                  |                                 | 20              |                         | 143          |
| Patient Demographics   | Age at Baseline    | 75.56 (9.96)  | 70.13 (8.21)        | p=0.13 <sup>&amp;</sup> | 70.88 (9.99)        | p=0.26 <sup>&amp;</sup> | 70.54 (9.81)        | p=0.29 <sup>&amp;</sup>         | 78.40 (7.08)    | p=0.81 <sup>&amp;</sup> | 72.24 (9.45) |
|                        | Sex (% Male)       | 44.44%        | 48.84%              | p>0.99 <sup>&amp;</sup> | 43.59%              | p>0.99 <sup>&amp;</sup> | 47.83%              | p>0.99 <sup>&amp;</sup>         | 35.00%          | p=0.97 <sup>&amp;</sup> | 44.75        |
|                        | Ever Smoked (%)    | 38.9          | 51.2                | p=0.86 <sup>&amp;</sup> | 51.3                | p=0.86 <sup>&amp;</sup> | 47.8                | p=0.97 <sup>&amp;</sup>         | 50.0            | p=0.94 <sup>&amp;</sup> | 48.95        |
|                        | OD (%)             | 44.44         | 65.12               | p=0.44 <sup>&amp;</sup> | 30.77               | p=0.80 <sup>&amp;</sup> | 47.83               | p>0.99 <sup>&amp;</sup>         | 45              | p>0.99 <sup>&amp;</sup> | 47.55        |
| Ocular Characteristics | Pseudophakia (%)   | 44.44         | 23.26               | p=0.31 <sup>&amp;</sup> | 15.38               | p=0.08 <sup>&amp;</sup> | 26.09               | p=0.56 <sup>&amp;</sup>         | 60%             | p=0.73 <sup>&amp;</sup> | 29.37        |
|                        | BCVA (letters)     | 84.89 (6.19)  | 84.19 (4.39)        | p=0.99 <sup>&amp;</sup> | 82.49 (6.73)        | p=0.56 <sup>&amp;</sup> | <b>78.43 (8.67)</b> | <b>p=0.0062<sup>&amp;</sup></b> | 80.3 (6.20)     | p=0.11 <sup>&amp;</sup> | 82.34 (6.64) |
|                        | Axial Length* (mm) | 24.14 (1.84)  | 24.28 (1.10)        | p>0.99 <sup>&amp;</sup> | 24.25 (1.19)        | p>0.99 <sup>&amp;</sup> | 23.81 (0.90)        | p=0.94 <sup>&amp;</sup>         | 24.04 (1.13)    | p>0.99 <sup>&amp;</sup> | 24.16 (1.20) |

Values represent means with standard deviations in parentheses.

† Large drusen defined as drusen > 125µm in diameter as scored from color fundus photographs

\* Axial length was obtained in 101 out of 143 study eyes (divided 12, 32, 30, 12, 15 for Groups 1, 2, 3, 4, SDD respectively).

& One-way ANOVA compared to Group 1, adjusted for multiple comparison using Sidak Corrections.

*SDD* Subretinal drusenoid deposit

*BCVA* Best-corrected visual acuity

*RIT* Rod-Intercept time
