# Supplementary material for: Macular Thickness in Intermediate Age-Related Macular Degeneration Is Influenced by Disease Severity and Subretinal Drusenoid Deposit Presence
Source: PubMed Central journal article supplement — Invest Ophthalmol Vis Sci. 2020 Jun 30;61(6):59. doi: 10.1167/iovs.61.6.59 (PMC7415904; doi:10.1167/iovs.61.6.59), 2020-06-30
Supplement: iovs-61-6-59_s004.pdf [file iovs-61-6-59_s004.pdf]

**Table S3. Multivariate analysis of parameters associated with absolute changes in total retinal thickness over 4 years in the subfoveal (1-mm), 3-mm and 6-mm central circles in eyes that did not develop any geographic atrophy (central or non-central) over four years (N=71).**

| Parameter                                  | Change in Total Retinal Thickness In Central 1-mm circle ( $\mu\text{m}$ ) |              | Change in Total Retinal Thickness In Central 3-mm circle ( $\mu\text{m}$ ) |               | Change in Total Retinal Thickness In Central 6-mm circle ( $\mu\text{m}$ ) |               |
|--------------------------------------------|----------------------------------------------------------------------------|--------------|----------------------------------------------------------------------------|---------------|----------------------------------------------------------------------------|---------------|
|                                            |                                                                            | p-value      |                                                                            | p-value       |                                                                            | p-value       |
| Age at Baseline                            | <b>0.34 (0.031, 0.65)</b>                                                  | <b>0.031</b> | 0.089 (-0.11, 0.29)                                                        | 0.38          | 0.00028 (-0.14, 0.14)                                                      | 0.99          |
| Male (%)                                   | -2.17 (-6.81, 2.48)                                                        | 0.35         | -1.57 (-4.60, 1.46)                                                        | 0.30          | -1.28 (-3.36, 0.80)                                                        | 0.22          |
| Smoking (%)                                | 1.67 (-2.95, 6.30)                                                         | 0.47         | 1.52 (-1.5, 4.54)                                                          | 0.32          | 0.96 (-1.04, 2.97)                                                         | 0.34          |
| BCVA baseline                              | 0.50 (-0.059, 1.05)                                                        | 0.079        | 0.074 (-0.28, 0.44)                                                        | 0.68          | -0.032 (-0.28, 0.21)                                                       | 0.79          |
| Change in BCVA over 4 Years (letters)      | <b>0.56 (0.12, 0.99)</b>                                                   | <b>0.013</b> | 0.21 (-0.07, 0.49)                                                         | 0.15          | -0.0078 (-0.20, 0.19)                                                      | 0.94          |
| Pseudophakia                               | -4.36 (-10.60, 1.88)                                                       | 0.17         | -2.96 (-7.03, 1.11)                                                        | 0.15          | -0.40 (-3.16, 2.35)                                                        | 0.77          |
| Group 1 vs Group 0                         | -4.35 (-10.06, 2.25)                                                       | 0.19         | -4.12 (-8.44, 0.19)                                                        | 0.061         | <b>-2.96 (-5.89, -0.020)</b>                                               | <b>0.049</b>  |
| Group 2 vs Group 0                         | -2.31 (-8.21, 3.58)                                                        | 0.44         | <b>-3.89 (-7.74, -0.041)</b>                                               | <b>0.048</b>  | -1.05 (-3.65, 1.53)                                                        | 0.42          |
| Group SDD vs Group 0                       | -7.27 (-15.71, 1.18)                                                       | 0.09         | <b>-9.97 (-15.49, -4.46)</b>                                               | <b>0.0006</b> | <b>-5.48 (-9.23, -1.74)</b>                                                | <b>0.0049</b> |
| Choroid Thickness (mm) at baseline*        | -0.0017 (-0.031, 0.034)                                                    | 0.91         | -0.00051 (-0, 0.020)                                                       | 0.96          | -0.0011(-0.018, 0.016)                                                     | 0.90          |
| Choroid Vascularity Index (%) at Baseline* | 25.96 (-21.35, 73.26)                                                      | 0.28         | 7.35 (-23.52, 38.21)                                                       | 0.64          | 5.32 (-21.73, 32.37)                                                       | 0.70          |

Values represent estimates with 95% confidence intervals in parenthesis. Significant estimates are highlighted in bold.

\*Choroidal features were assessed in a single horizontal scan traversing the fovea across the central 3-mm region centered on the fovea for TRT in central 1mm- and 3mm-circle. Choroidal features were assessed in a single horizontal scan traversing the fovea across the central 6-mm region centered on the fovea for TRT in central in central 6-mm circle.
